# Supplementary material for: Nicotinamide riboside kinases regulate skeletal muscle fiber-type specification and are rate-limiting for metabolic adaptations during regeneration
Source: PubMed Central journal article supplement (PMC9682158; doi:10.3389/fcell.2022.1049653), 2022-11-09
Supplement: Image1.pdf [file Image1.pdf]

# Supplementary Material

## 1.1 Supplementary Figures

**A**

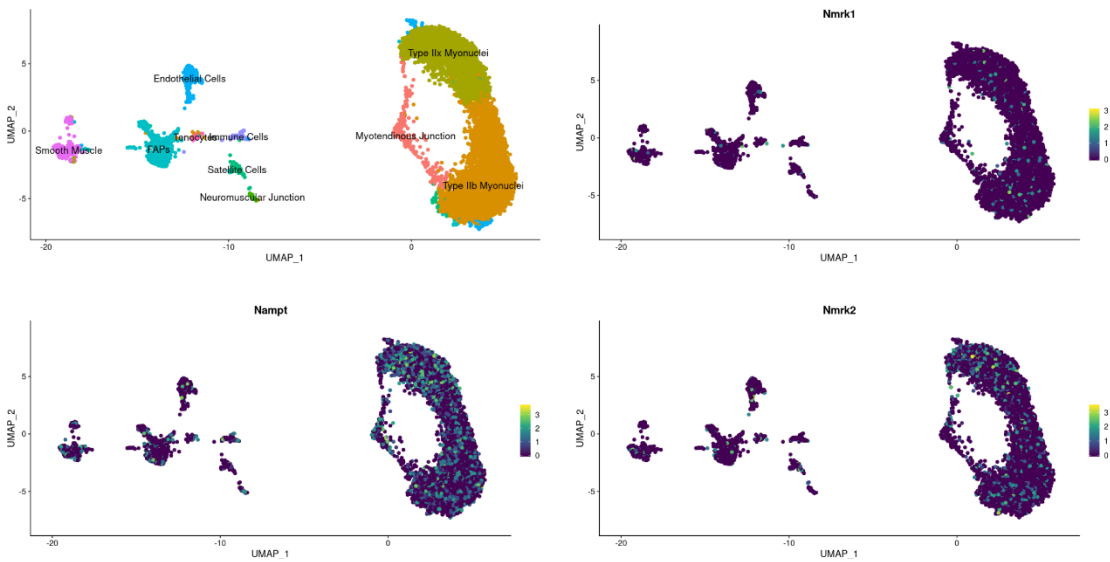

**B**

*Tibialis Anterior* (5 m.o.)

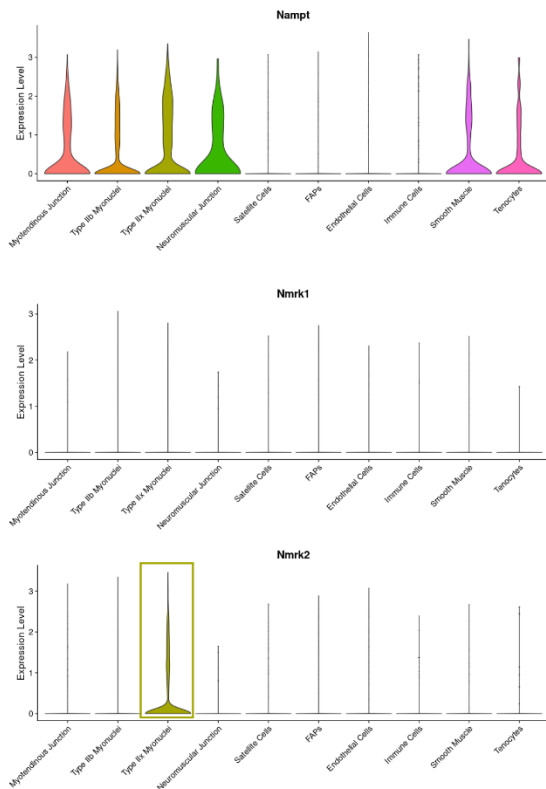

**C**

*Soleus* (5 m.o.)

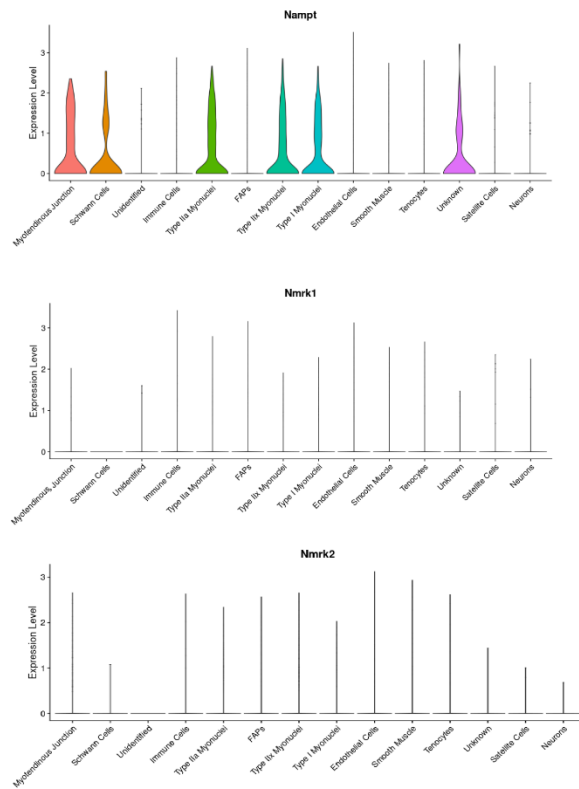

**Supplementary Figure 1: Expression of *Nampt*, *Nmrk1*, and *Nmrk2* in single-nuclei RNA-sequencing dataset of 5-month-old (m.o.) WT mice. (A-C) UMAP (A) and violin plots (B,C) of *tibialis anterior* (B) and *soleus* (C) muscles showing gene expression for myonuclear populations of *Nampt*, *Nmrk1*, and *Nmrk2*. The y-axis shows expression level as probability distribution across clusters. TA muscle samples from one mouse and pooled soleus samples from 4 mice were analyzed from Petrany et al. (38).**

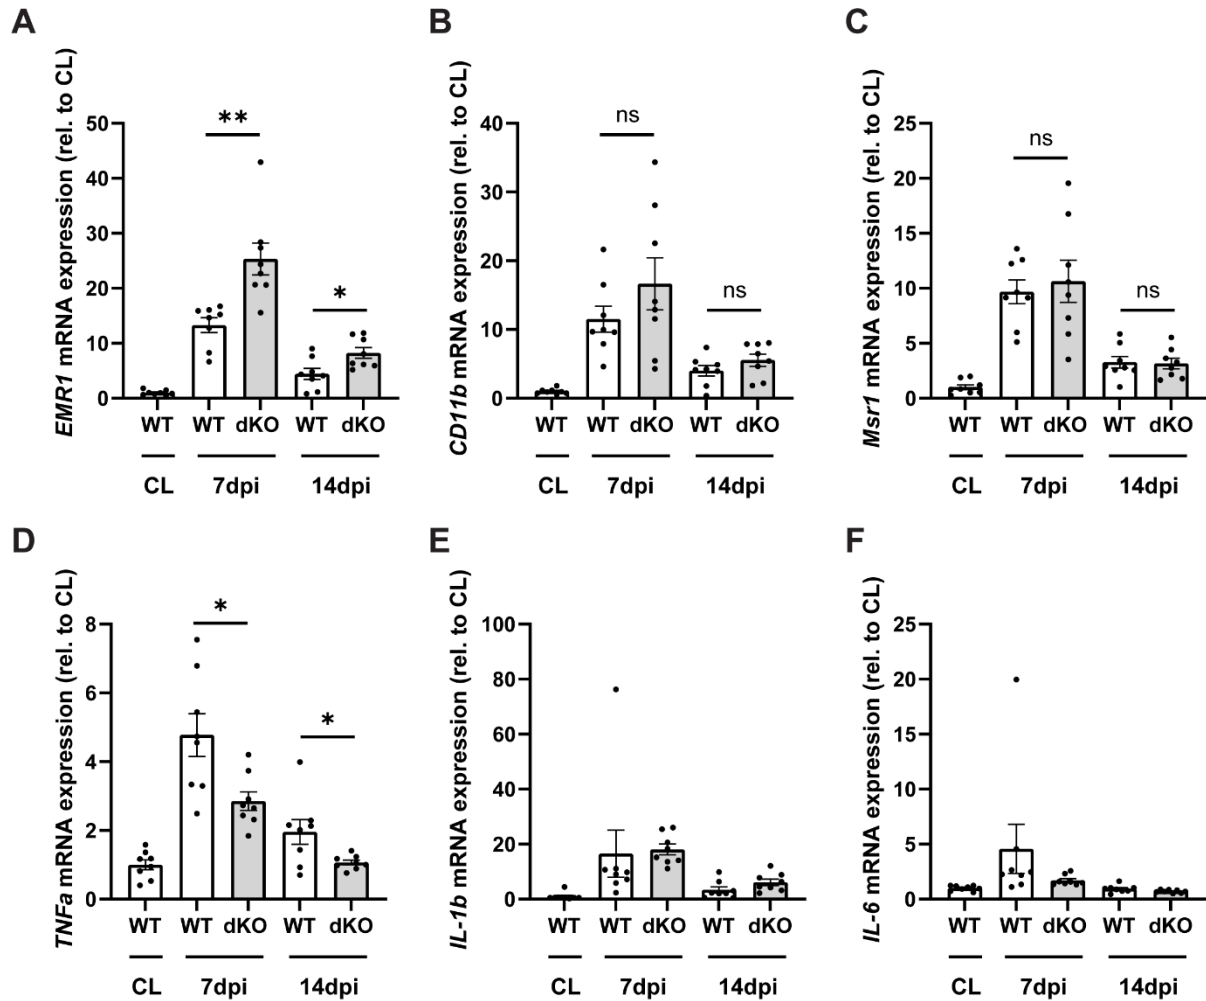

**Supplementary Figure 2: CTX-induced immune response is not altered in NRKdKO muscle.**

mRNA expression of cellular surface markers of pro-inflammatory macrophages. (A) *F4/80* and (B) *CD11b*, and anti-inflammatory macrophages (C) *Msr1*. mRNA expression of cytokines (D) *Tnfa*, (E) *IL-1b*, and (F) *IL-6*. Gene expression of mRNA extracted from TA muscle measured by qPCR relative to *Atp5b*, *Eif2a*, and *Psmb4* as housekeeping genes. Results shown are mean  $\pm$  s.e.m. with \* $p < 0.05$ , \*\* $p < 0.01$  WT, determined by unpaired Student's t-test,  $n=6-8$ .
